# Supplementary material
Source: PubMed Central journal article supplement (PMC4019176)
Supplement: IAI.01679-14_zii999090698so1.pdf [file IAI.01679-14_zii999090698so1.pdf]

**A**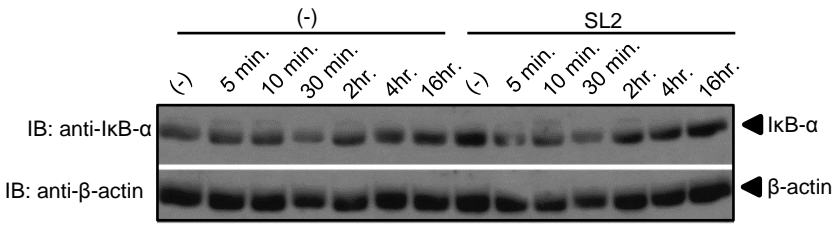**B**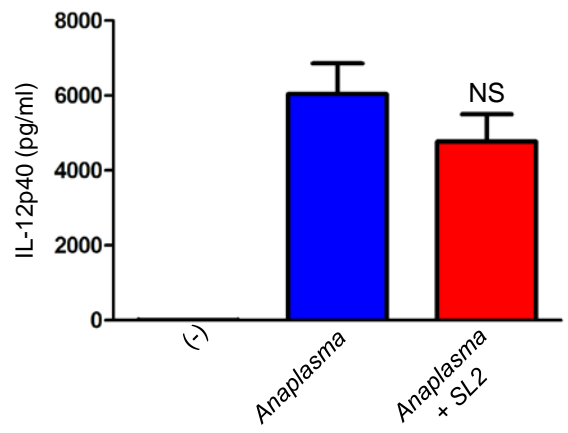**C**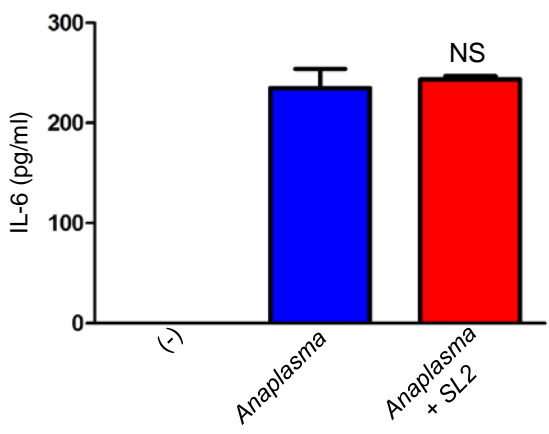

A

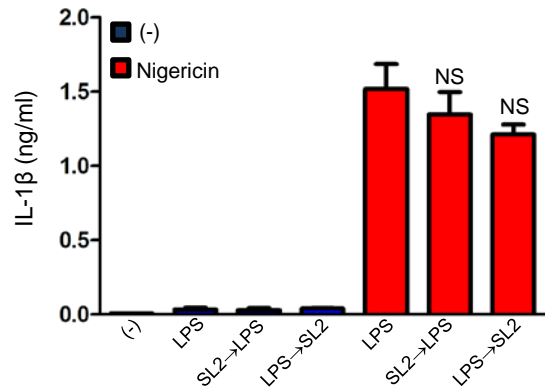

B

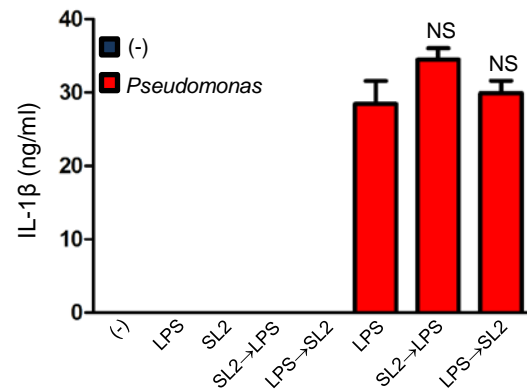

C

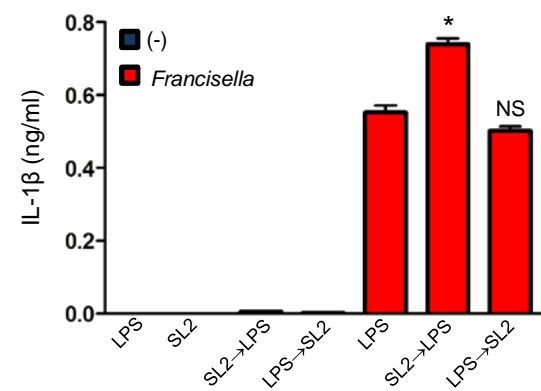

Chen *et al.*, 2014 – Figure S2

A

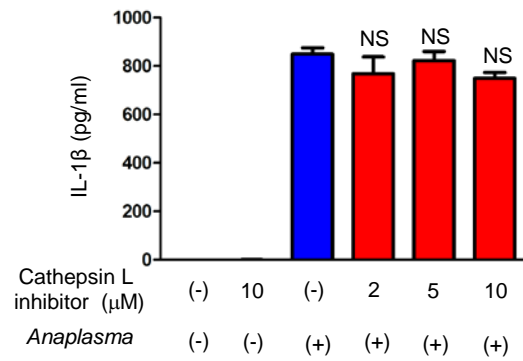

B

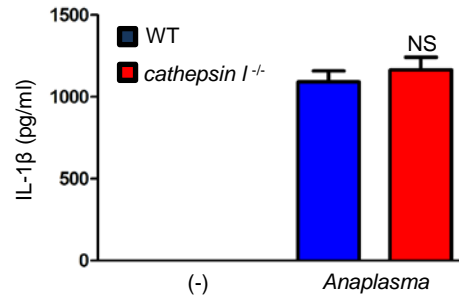

C

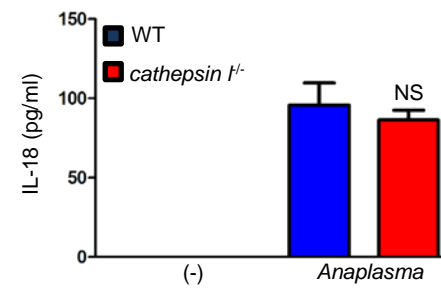

D

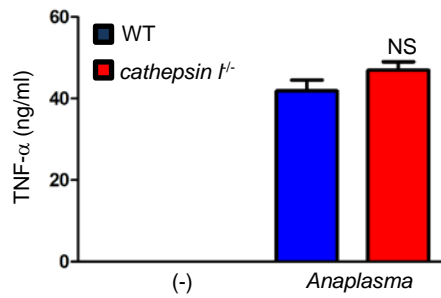Chen *et al.*, 2014 – Figure S3

## Supplemental Figure Legends

### Figure S1: Sialostatin L2 does not mitigate NF- $\kappa$ B signaling in macrophages during *A.*

*phagocytophilum* stimulation. BMDMs ( $1 \times 10^6$ ) were stimulated with *A. phagocytophilum* (MOI 50) in the presence or absence of sialostatin L2 (SL2 - 3  $\mu$ M). (A) I $\kappa$ B- $\alpha$  was measured by western blot (IB) at the indicated time points.  $\beta$ -actin was used as a loading control. (B) IL-12p40 and (C) IL-6 were measured by ELISA. Cytokine measurements were taken in triplicate and presented as mean  $\pm$  SEM. These experiments were repeated twice. Student's t test. (-) non-stimulated cells. NS – not significant.

### Figure S2: Sialostatin L2 does not hinder IL-1 $\beta$ secretion mediated by known NLRP3,

NLRC4 and AIM2 agonists. BMDMs ( $8 \times 10^5$ ) were stimulated with (A) nigericin (10  $\mu$ M) (B) *P. aeruginosa* PAK (MOI 10) or (C) *F. tularensis* LVS (MOI 50) for 9 hours in the presence or absence of sialostatin L2 (SL2 - 3  $\mu$ M) for 30 minutes either prior to or immediately after priming with LPS (50  $\eta$ g/ml). IL-1 $\beta$  secretion in the supernatants was assessed by ELISA. Experiments represent mean  $\pm$  SEM performed in triplicate and were repeated twice. \* $P < .05$ , ANOVA (post-hoc Bonferroni). (-) non-stimulated cells. NS – not significant.

### Figure S3: Cathepsin L does not affect caspase-1 maturation during *A. phagocytophilum*

stimulation. BMDMs ( $1 \times 10^6$ ) were pretreated with the indicated concentrations of the cathepsin L inhibitor for 30 minutes and stimulated with *A. phagocytophilum* (MOI 50) for 18 hours. (A) IL-1 $\beta$  was measured by ELISA. (B-D) BMDMs ( $1 \times 10^6$ ) from C57BL/6 (WT) and *cathepsin l*<sup>-/-</sup> mice were stimulated with *A. phagocytophilum* (MOI 50) for 18 hours. (B) IL-1 $\beta$ , (C) IL-18 and (D) TNF- $\alpha$  were measured by ELISA. Cytokine measurements were taken in triplicate and

24 presented as mean  $\pm$  SEM. These experiments were repeated twice. \* $P < .05$ , (A) ANOVA (post-  
25 hoc Bonferroni); (B-D) Student's t test. (-) non-stimulated cells. NS – not significant.
